# Supplementary material for: BS Seeker: precise mapping for bisulfite sequencing
Source: Springer Nature journal article supplement (doi:10.1186/1471-2105-11-203), 2010-04-23

## Cokus *et al*'s library protocol

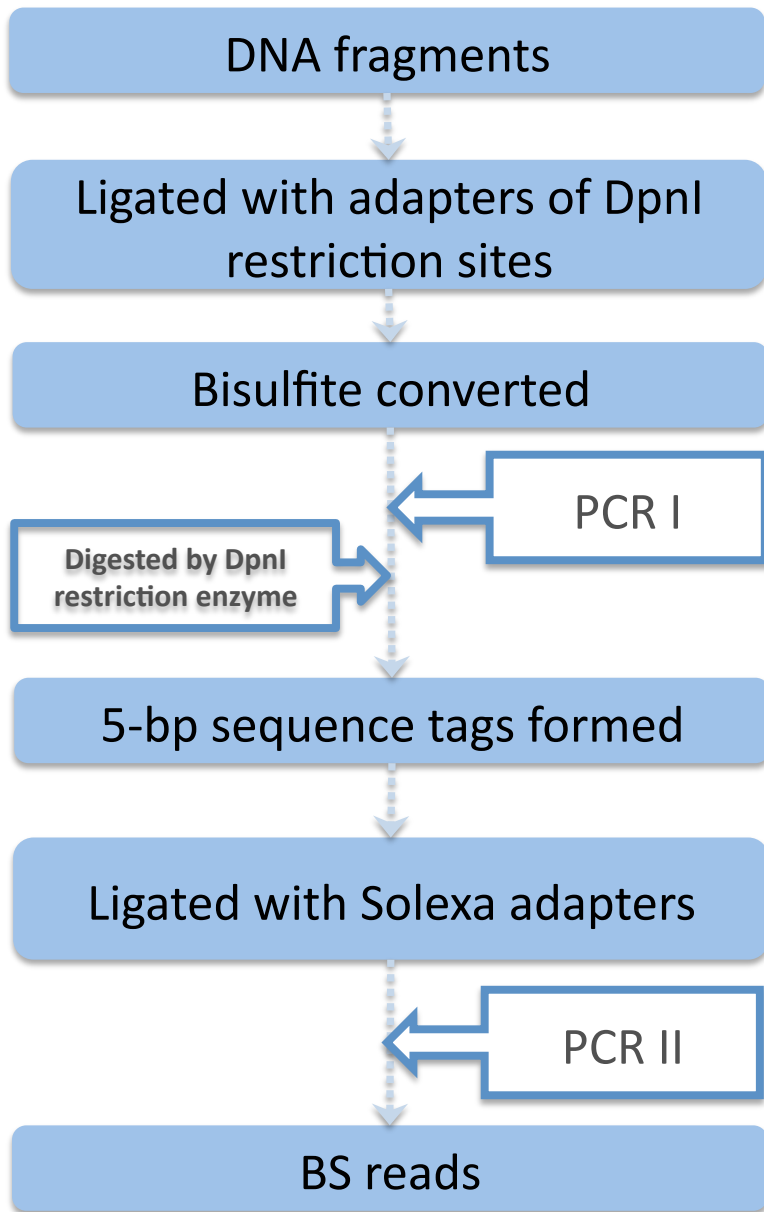

## Lister *et al*'s library protocol

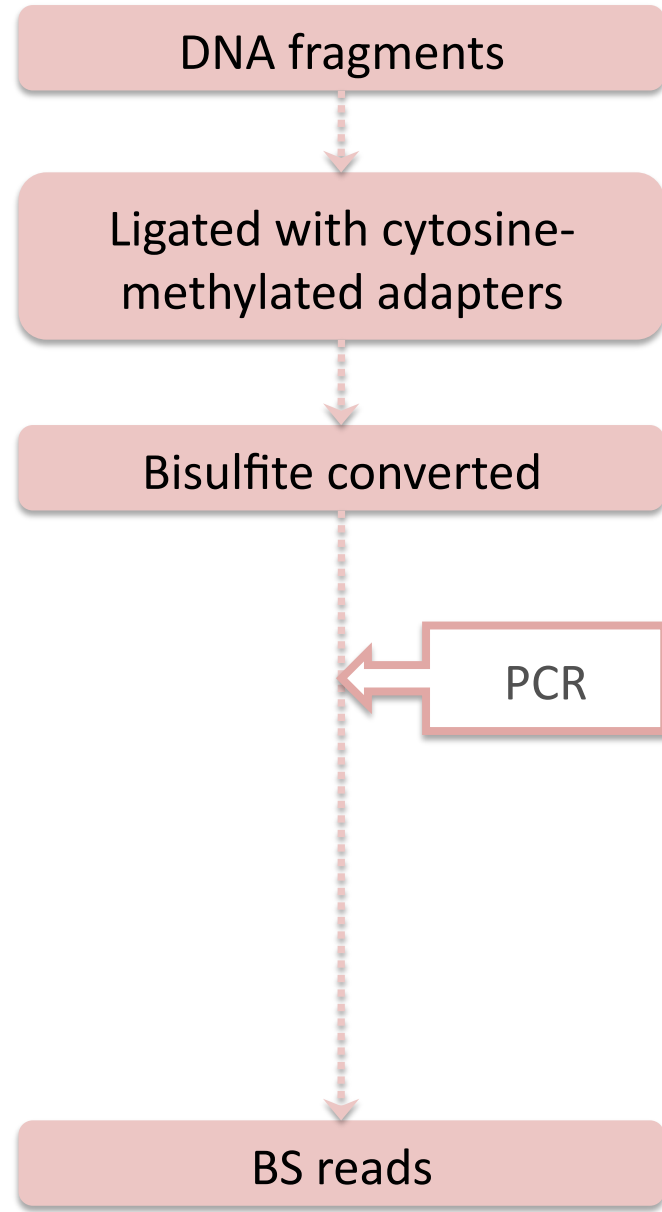

Supplement: 12859_2009_3660_MOESM4_ESM.pdf [file 12859_2009_3660_MOESM4_ESM.pdf]
