# Supplementary material for: BS Seeker: precise mapping for bisulfite sequencing
Source: Springer Nature journal article supplement (doi:10.1186/1471-2105-11-203), 2010-04-23
Supplement: 12859_2009_3660_MOESM5_ESM.pdf [file 12859_2009_3660_MOESM5_ESM.pdf]

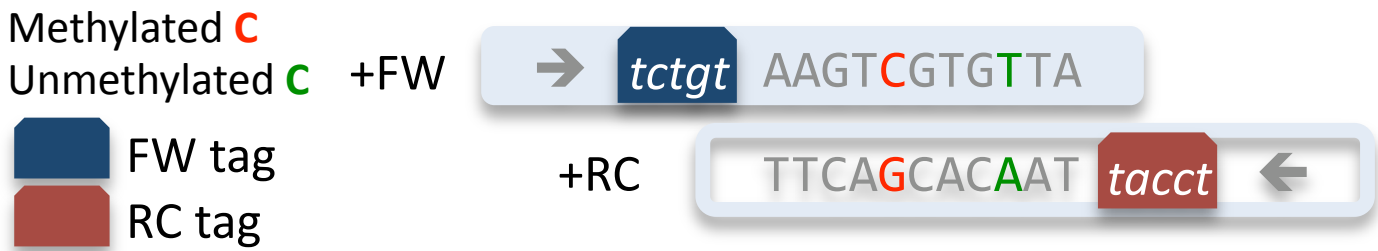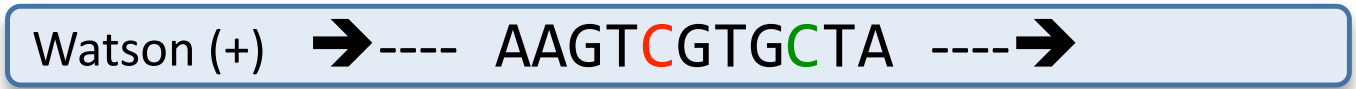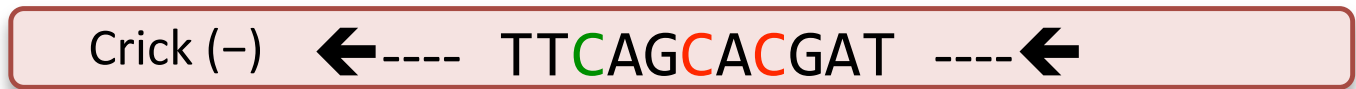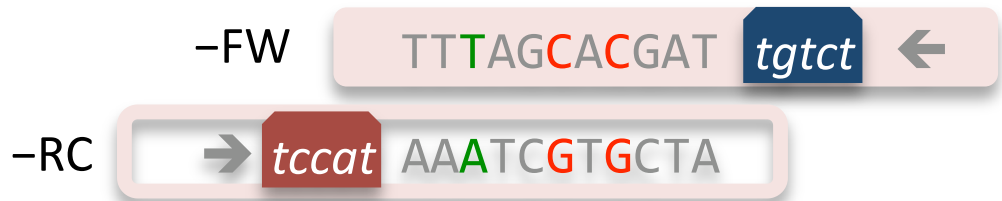

A.

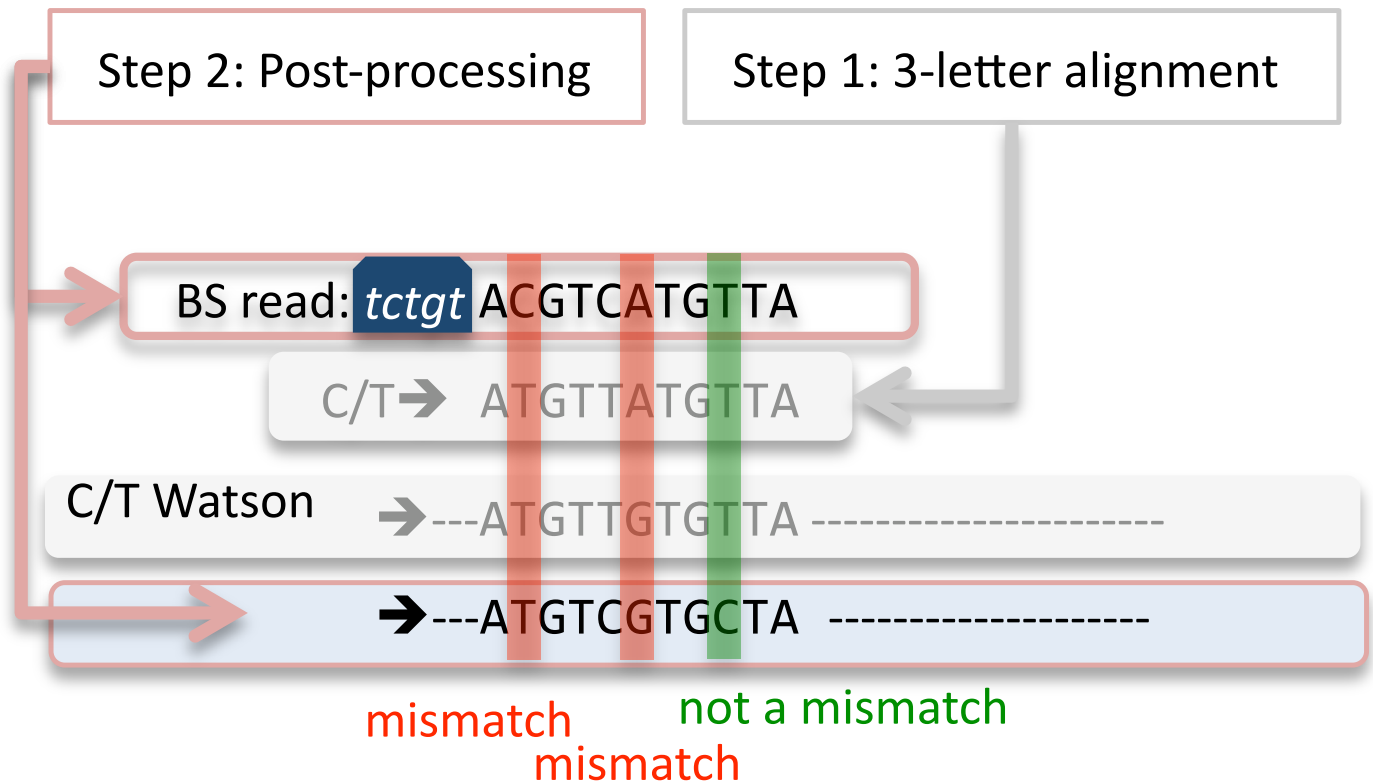

B.
